# Supplementary material
Source: publisher figshare collection journal article supplement (https://acs.figshare.com/ndownloader/files/5175328)
Supplement: Supplementary file 1 [file 5175328]

data_26DMPDA 
_audit_creation_date                  'Wed Sep 10 17:32:03 2003'
_audit_creation_method                'by teXsan'
_audit_update_record                   ?
#------------------------------------------------------------------------------
# SUBMISSION DETAILS 
_publ_contact_author_name             ' Dr Kimihisa Yamamoto'
_publ_contact_author_address 
; 
Department of Chemistry
Faculty of Science & Technology 
Keio University
Yokohama 223-8522, Japan
; 
_publ_contact_author_email            ' yamamoto@chem.keio.ac.jp '
_publ_contact_author_fax              ' +81 45 566 1718 '
_publ_contact_author_phone            ' +81 45 566 1718 '
_publ_contact_letter
;
This CIF is aimed for Cambridge Structural Database.
The original paper has been submitted.

Journal:
Journal of the American Chemical Society

Title: 
The Class II/III Transition Electron Transfer on an Infrared 
Vibrational Time Scale for N,N'-Diphenyl-1,4-phenylenediamine 
Structures as a Polyaniline Unit

Authors:
Toyohiko Nishiumi, Yasuhiro Nomura, Yuya Chimoto Masayoshi Higuchi, 
and Kimihisa Yamamoto
;
#------------------------------------------------------------------------------
# TITLE AND AUTHOR LIST 

_publ_section_title 
; 
Supplementary Information of X-ray Crystal Analysis of 26DMPDA 
; 
loop_ 
_publ_author_name 
_publ_author_address 
' Kimihisa Yamamoto '
;
Department of Chemistry
Faculty of Science & Technology 
Keio University
Yokohama 223-8522, Japan
;
#------------------------------------------------------------------------------
# TEXT 

_publ_section_acknowledgements 
;
;

_publ_section_references 
; 
Altomare, A., Cascarano, G., Giacovazzo, C., Guagliardi, A.,
Burla, M. C., Polidori, G. & Camalli, M. (1994).
J. Appl. Cryst. 27, 435.

Beurskens, P. T., Admiraal, G., Beurskens, G., Bosman, W. P., 
Garcia-Granda, S., Gould, R. O., Smits, J. M. M. & Smykalla, C. (1992).
The DIRDIF program system. PATTY. Technical Report of the 
Crystallography Laboratory, University of Nijmegen, The Netherlands.

Johnson, C. K. (1976). ORTEP-II. A Fortran Thermal-Ellipsoid Plot 
Program. Report ORNL-5138. Oak Ridge National Laboratory, Oak 
Ridge, Tennessee, USA.

Molecular Structure Corporation. (1993).
MSC/AFC Diffractometer Control Software.
MSC, 3200 Research Forest Drive, The Woodlands, TX 77381, USA.

Sheldrick, G. M. (1997) SHELXL97. Program for the Refinement of 
Crystal Structures. University of G\"ottingen, Germany.

Molecular Structure Corporation, Rigaku Corporation. (2000). teXsan. 
Single Crystal Structure Analysis Software. Version 1.11. 
MSC, 3200 Research Forest Drive, The Woodlands, TX 77381, USA. 
Rigaku, 3-9-12 Akishima, Tokyo, Japan. 
; 

_publ_section_exptl_prep 
; 
The crystals were grown by slow diffusion of methanol vapor into a 
acetonitorile solution of the compound.
;
_publ_section_exptl_refinement
;
X-ray intensities were measured for +h, -k, +-l (\q<69.1\%)
and +-h, +k, +-l (\q<30.0\%) reflections. H-atom positions were attached 
only to carbon atoms.
;
#------------------------------------------------------------------------------
#data_DMPDA
#------------------------------------------------------------------------------
# CHEMICAL DATA
_chemical_formula_sum                  'C22 H24 N2 '
_chemical_formula_moiety               'C22 H24 N2 '
_chemical_formula_weight               316.45
_chemical_melting_point                ?
#------------------------------------------------------------------------------
# CRYSTAL DATA
_symmetry_cell_setting                 monoclinic
_symmetry_space_group_name_H-M        'P 1 21/n 1'
_symmetry_Int_Tables_number            14
loop_
_symmetry_equiv_pos_as_xyz
x,y,z
1/2-x,1/2+y,1/2-z
-x,-y,-z
1/2+x,1/2-y,1/2+z
_cell_length_a                         8.062(1)
_cell_length_b                         14.302(2)
_cell_length_c                         7.977(1)
_cell_angle_alpha                      90
_cell_angle_beta                       103.46(1)
_cell_angle_gamma                      90
_cell_volume                           894.5(2)
_cell_formula_units_Z                  2
_cell_measurement_reflns_used          25
_cell_measurement_theta_min            10.1
_cell_measurement_theta_max            13.7
_cell_measurement_temperature          297.2
#------------------------------------------------------------------------------
_exptl_crystal_description            'prism'
_exptl_crystal_colour                 'colorless'
_exptl_crystal_size_max                0.60
_exptl_crystal_size_mid                0.40
_exptl_crystal_size_min                0.40
_exptl_crystal_size_rad                ?
_exptl_crystal_density_diffrn          1.175
_exptl_crystal_density_meas            ?
_exptl_crystal_density_method         'not measured'
_exptl_absorpt_coefficient_mu          0.069
_exptl_absorpt_correction_type         psi-scan
_exptl_absorpt_process_details        '(North, Phillips & Mathews, 1968)'
_exptl_absorpt_correction_T_min        0.982
_exptl_absorpt_correction_T_max        1.000
#------------------------------------------------------------------------------
# EXPERIMENTAL DATA 
_diffrn_radiation_type                'Mo K\a' 
_diffrn_radiation_wavelength           0.71073 
_diffrn_measurement_device_type       'Rigaku AFC7R' 
_diffrn_measurement_method             \w-2\q 
_diffrn_reflns_number                  2428 
_diffrn_reflns_av_R_equivalents        0.000
_diffrn_reflns_theta_min               2.5
_diffrn_reflns_theta_max               27.5
_diffrn_reflns_theta_full               27.5
_diffrn_measured_fraction_theta_max     1.0
_diffrn_measured_fraction_theta_full     1.0
_diffrn_reflns_limit_h_min             0
_diffrn_reflns_limit_h_max             10
_diffrn_reflns_limit_k_min             0
_diffrn_reflns_limit_k_max             18
_diffrn_reflns_limit_l_min             -10
_diffrn_reflns_limit_l_max             10
_diffrn_standards_number              3
_diffrn_standards_interval_count      150
_diffrn_standards_decay_%             0.20
#------------------------------------------------------------------------------
# REFINEMENT DATA
_refine_special_details
;
Refinement using reflections with F^2^ > 0.0 sigma(F^2^). The weighted R-factor
(wR), goodness of fit (S) and R-factor (gt) are based on F, with F set to zero
for negative F. The threshold expression of F^2^ > 2.0 sigma(F^2^) is used only
for calculating R-factor (gt).
;
_reflns_number_total                   2060
_reflns_number_gt                      1439
_reflns_threshold_expression                'I>2\S(I)'
_refine_ls_structure_factor_coef            Fsqd
_refine_ls_R_factor_gt                 0.060
_refine_ls_wR_factor_ref               0.201
_refine_ls_hydrogen_treatment          noref
_refine_ls_number_reflns               1439
_refine_ls_number_parameters           110
_refine_ls_goodness_of_fit_ref         1.10
_refine_ls_weighting_scheme            calc
_refine_ls_weighting_details
    'w = 1/[\s^2^(Fo^2^) + (0.0943P)^2^+0.2429P] where P=(Fo^2^+2Fc^2^)/3'
_refine_ls_shift/su_max                0.0000
_refine_ls_extinction_method           none
_refine_diff_density_max               0.27
_refine_diff_density_min               -0.31
loop_
_atom_type_symbol
_atom_type_description
_atom_type_scat_dispersion_real
_atom_type_scat_dispersion_imag
_atom_type_scat_source
   'C' 'C'  0.003 0.002
;International Tables for Crystallography
(1992, Vol. C, Tables 4.2.6.8 and 6.1.1.4)
;
   'H' 'H'  0.000 0.000
;International Tables for Crystallography
(1992, Vol. C, Table 6.1.1.4)
;
   'N' 'N'  0.006 0.003
;International Tables for Crystallography
(1992, Vol. C, Tables 4.2.6.8 and 6.1.1.4)
;
#------------------------------------------------------------------------------
# ATOMIC COORDINATES AND DISPLACEMENT PARAMETERS
loop_
_atom_site_label
_atom_site_type_symbol
_atom_site_fract_x
_atom_site_fract_y
_atom_site_fract_z
_atom_site_U_iso_or_equiv
_atom_site_adp_type
_atom_site_occupancy
_atom_site_calc_flag
_atom_site_refinement_flags
_atom_site_disorder_assembly
_atom_site_disorder_group
  N(1)   N  0.8245(2)   0.0473(1)   0.9546(2)   0.0597(5)   Uani 1.00 d . . .
  C(2)   C  0.4864(2)   -0.0632(2)  1.1266(2)   0.0506(5)   Uani 1.00 d . . .
  C(3)   C  0.6453(2)   -0.0393(1)  1.1017(2)   0.0499(5)   Uani 1.00 d . . .
  C(4)   C  0.6612(2)   0.0244(1)   0.9757(2)   0.0458(5)   Uani 1.00 d . . .
  C(5)   C  0.8552(2)   0.1007(2)   0.8153(2)   0.0502(5)   Uani 1.00 d . . .
  C(6)   C  0.9286(3)   0.1897(2)   0.8447(3)   0.0585(6)   Uani 1.00 d . . .
  C(7)   C  0.9657(3)   0.2377(2)   0.7060(4)   0.0712(7)   Uani 1.00 d . . .
  C(8)   C  0.9295(4)   0.1997(2)   0.5449(3)   0.0769(8)   Uani 1.00 d . . .
  C(9)   C  0.8575(3)   0.1126(2)   0.5172(3)   0.0695(7)   Uani 1.00 d . . .
  C(10)  C  0.8194(3)   0.0608(2)   0.6504(3)   0.0557(5)   Uani 1.00 d . . .
  C(11)  C  0.7454(4)   -0.0356(2)  0.6169(3)   0.0721(7)   Uani 1.00 d . . .
  C(12)  C  0.9660(4)   0.2325(2)   1.0216(4)   0.0813(8)   Uani 1.00 d . . .
  H(1)   H  0.9038      0.0450      1.0450      0.0990      Uiso 1.00 calc . . .
  H(2)   H  0.4741      -0.1080     1.2116      0.0990      Uiso 1.00 calc . . .
  H(3)   H  0.7543      -0.0677     1.1838      0.0990      Uiso 1.00 calc . . .
  H(7)   H  1.0124      0.3021      0.7259      0.0990      Uiso 1.00 calc . . .
  H(8)   H  0.9458      0.2363      0.4444      0.0990      Uiso 1.00 calc . . .
  H(9)   H  0.8360      0.0858      0.4104      0.0990      Uiso 1.00 calc . . .
  H(11A) H  0.6407      -0.0323     0.5342      0.0875      Uiso 1.00 calc . . .
  H(11B) H  0.8235      -0.0737     0.5739      0.0875      Uiso 1.00 calc . . .
  H(11C) H  0.7292      -0.0611     0.7211      0.0875      Uiso 1.00 calc . . .
  H(12A) H  0.8673      0.2282      1.0664      0.1027      Uiso 1.00 calc . . .
  H(12B) H  1.0585      0.2024      1.0928      0.1027      Uiso 1.00 calc . . .
  H(12C) H  0.9923      0.2977      1.0109      0.1027      Uiso 1.00 calc . . .

loop_
_atom_site_aniso_label
_atom_site_aniso_U_11
_atom_site_aniso_U_22
_atom_site_aniso_U_33
_atom_site_aniso_U_12
_atom_site_aniso_U_13
_atom_site_aniso_U_23
  N(1)   0.0428(9)   0.084(1)    0.0538(10)  0.0029(8)   0.0134(7)   0.0178(9)
  C(2)   0.049(1)    0.059(1)    0.0462(10)  0.0089(8)   0.0156(8)   0.0130(8)
  C(3)   0.0468(10)  0.059(1)    0.0445(10)  0.0099(8)   0.0119(7)   0.0076(8)
  C(4)   0.0459(10)  0.052(1)    0.0422(9)   0.0055(8)   0.0156(7)   0.0005(8)
  C(5)   0.0419(9)   0.059(1)    0.053(1)    0.0055(8)   0.0185(8)   0.0061(9)
  C(6)   0.053(1)    0.061(1)    0.064(1)    0.0031(9)   0.0179(9)   -0.0019(10)
  C(7)   0.074(1)    0.060(1)    0.086(2)    -0.005(1)   0.032(1)    0.006(1)
  C(8)   0.097(2)    0.073(2)    0.073(2)    -0.001(1)   0.044(1)    0.012(1)
  C(9)   0.086(2)    0.074(2)    0.057(1)    0.002(1)    0.034(1)    -0.002(1)
  C(10)  0.055(1)    0.058(1)    0.058(1)    0.0055(9)   0.0224(9)   0.0006(9)
  C(11)  0.085(2)    0.065(1)    0.071(1)    -0.001(1)   0.027(1)    -0.007(1)
  C(12)  0.088(2)    0.082(2)    0.071(2)    -0.007(1)   0.013(1)    -0.012(1)
#------------------------------------------------------------------------------
_computing_data_collection            'WinAFC'
_computing_cell_refinement            'WinAFC'
_computing_data_reduction             'teXsan Ver. 1.11'
_computing_structure_solution          SIR92
_computing_structure_refinement       'SHELXL97'
_computing_publication_material       'teXsan Ver. 1.11'
_computing_molecular_graphics          ?
#------------------------------------------------------------------------------
_geom_special_details
;
  ?
;
loop_
_geom_bond_atom_site_label_1
_geom_bond_atom_site_label_2
_geom_bond_distance
_geom_bond_site_symmetry_1
_geom_bond_site_symmetry_2
_geom_bond_publ_flag
  N(1)      C(4)      1.404(3)   . . yes
  N(1)      C(5)      1.417(3)   . . yes
  N(1)      H(1)      0.845      . . no
  C(2)      C(3)      1.385(3)   . . yes
  C(2)      C(4)      1.391(3)   . 3_657 yes
  C(2)      H(2)      0.954      . . no
  C(3)      C(4)      1.385(3)   . . yes
  C(3)      H(3)      1.048      . . no
  C(5)      C(6)      1.400(3)   . . yes
  C(5)      C(10)     1.401(3)   . . yes
  C(6)      C(7)      1.392(4)   . . yes
  C(6)      C(12)     1.503(4)   . . yes
  C(7)      C(8)      1.362(4)   . . yes
  C(7)      H(7)      0.994      . . no
  C(8)      C(9)      1.370(4)   . . yes
  C(8)      H(8)      0.991      . . no
  C(9)      C(10)     1.387(4)   . . yes
  C(9)      H(9)      0.913      . . no
  C(10)     C(11)     1.502(3)   . . yes
  C(11)     H(11A)    0.943      . . no
  C(11)     H(11B)    0.955      . . no
  C(11)     H(11C)    0.945      . . no
  C(12)     H(12A)    0.947      . . no
  C(12)     H(12B)    0.932      . . no
  C(12)     H(12C)    0.964      . . no
#------------------------------------------------------------------------------
loop_
_geom_angle_atom_site_label_1
_geom_angle_atom_site_label_2
_geom_angle_atom_site_label_3
_geom_angle
_geom_angle_site_symmetry_1
_geom_angle_site_symmetry_2
_geom_angle_site_symmetry_3
_geom_angle_publ_flag
    C(4)      N(1)      C(5)      124.0(1)   . . . yes
    C(4)      N(1)      H(1)      115.7      . . . no
    C(5)      N(1)      H(1)      117.0      . . . no
    C(3)      C(2)      C(4)      120.7(2)   . . 3_657 yes
    C(3)      C(2)      H(2)      121.3      . . . no
    C(4)      C(2)      H(2)      117.9      3_657 . . no
    C(2)      C(3)      C(4)      120.8(2)   . . . yes
    C(2)      C(3)      H(3)      118.9      . . . no
    C(4)      C(3)      H(3)      120.2      . . . no
    N(1)      C(4)      C(2)      122.3(2)   . . 3_657 yes
    N(1)      C(4)      C(3)      119.2(2)   . . . yes
    C(2)      C(4)      C(3)      118.5(2)   3_657 . . yes
    N(1)      C(5)      C(6)      120.2(2)   . . . yes
    N(1)      C(5)      C(10)     118.8(2)   . . . yes
    C(6)      C(5)      C(10)     120.9(2)   . . . yes
    C(5)      C(6)      C(7)      118.4(2)   . . . yes
    C(5)      C(6)      C(12)     120.8(2)   . . . yes
    C(7)      C(6)      C(12)     120.8(2)   . . . yes
    C(6)      C(7)      C(8)      121.0(2)   . . . yes
    C(6)      C(7)      H(7)      118.3      . . . no
    C(8)      C(7)      H(7)      120.7      . . . no
    C(7)      C(8)      C(9)      120.3(3)   . . . yes
    C(7)      C(8)      H(8)      120.9      . . . no
    C(9)      C(8)      H(8)      118.7      . . . no
    C(8)      C(9)      C(10)     121.5(2)   . . . yes
    C(8)      C(9)      H(9)      120.9      . . . no
    C(10)     C(9)      H(9)      117.5      . . . no
    C(5)      C(10)     C(9)      117.9(2)   . . . yes
    C(5)      C(10)     C(11)     121.8(2)   . . . yes
    C(9)      C(10)     C(11)     120.3(2)   . . . yes
    C(10)     C(11)     H(11A)    109.4      . . . no
    C(10)     C(11)     H(11B)    108.7      . . . no
    C(10)     C(11)     H(11C)    109.2      . . . no
    H(11A)    C(11)     H(11B)    109.6      . . . no
    H(11A)    C(11)     H(11C)    110.5      . . . no
    H(11B)    C(11)     H(11C)    109.5      . . . no
    C(6)      C(12)     H(12A)    109.0      . . . no
    C(6)      C(12)     H(12B)    109.9      . . . no
    C(6)      C(12)     H(12C)    108.1      . . . no
    H(12A)    C(12)     H(12B)    111.3      . . . no
    H(12A)    C(12)     H(12C)    108.6      . . . no
    H(12B)    C(12)     H(12C)    109.9      . . . no
#------------------------------------------------------------------------------
#------------------------------------------------------------------------------
